# Supplementary material for: Application of a modified distributed-dynamic erosion and sedimentyield model in a typical watershed of hilly and gully region, ChineseLoess Plateau
Source: Copernicus journal article supplement (doi:10.5194/se-2016-127), 2016-09-07
Supplement: Supplementary file [file se-2016-127-EC1-supplement.pdf]

# Application of a modified distributed-dynamic erosion and sediment yield model in a typical watershed of hilly and gully region, Chinese Loess Plateau

Lei Wu<sup>1,2,3</sup>, Xia Liu<sup>4</sup>, Xiaoyi Ma<sup>1,3</sup>

<sup>1</sup>College of Water Resources and Architectural Engineering, Northwest A&F University, Yangling, 712100, P.R. China

<sup>2</sup>State Key Laboratory of Soil Erosion and Dryland Farming on the Loess Plateau, Northwest A&F University, Yangling, 712100, P.R. China

<sup>3</sup>Key Laboratory of Agricultural Soil and Water Engineering in Arid and Semiarid Areas of Ministry of Education, Northwest A&F University, Yangling, 712100, P.R. China

<sup>4</sup>Construction Department, Northwest A&F University, Yangling, 712100, P.R. China

Correspondence to: L. Wu (lwu@nwsuaf.edu.cn)

**Abstract.** Soil erosion not only results in the destruction of land resources and the decline of soil fertility, but also ~~makes~~ ~~contributes to~~ river channel sedimentation. In order to explore ~~the~~ spatiotemporal evolution of erosion and sediment yield before and after returning farmland in a typical watershed of ~~a~~ hilly and gully region, ~~—~~ (Chinese Loess Plateau), a distributed-dynamic model of sediment yield based on the Chinese Soil Loss equation (CSLE) was established and modified to assess ~~the~~ effects of hydrological factors and human activities on erosion and sediment yield ~~from-between~~ 1995 ~~to-and~~ 2013. Results ~~indicate~~ ~~showed~~ that: 1) the modified model has characteristics of simple algorithm, high accuracy, wide practicability and easy expansion, and can be applied to predict erosion and sediment yield ~~in the study area of the hilly and gully region, Chinese Loess Plateau.~~ 2) soil erosion gradations are closely related to ~~the~~ spatial ~~distributions~~ ~~distribution~~ of rainfall erosivity and land use patterns, the current soil and water conservation ~~measures~~ are not ~~very idealefficient~~ for high rainfall ~~intensityintensities-~~, 3) the average sediment yield ~~modulusrate~~ before and after model modification in recent 5 years (in addition to 2013) is 4574.62 Mg/km<sup>2</sup> and 1696.1 Mg/km<sup>2</sup>, respectively, ~~it has decreaseddecreasing~~ by about 35.4% and 78.2% ~~comparing-when compared towith~~ the early governance (1995-1998). However, in July 2013 the once-in-a-century storm is the most important ~~reason for the emergence of~~ maximum ~~sediment yield~~. Results may provide effective and scientific basis for soil and water conservation planning and ecological ~~construction~~ of the hilly and gully region, Chinese Loess Plateau.

**Key words:** Soil erosion; Sediment yield; Dynamic model; Returning farmland; Spatio-temporal evolution

## 1. Introduction

Soil erosion is one of the main environmental ~~disasters-risks~~ that restricts ~~the~~ survival and development of human beings (Ongley et al., 2010), ~~affects regular land development and has been reported as the main cause of it will bring disastrous~~ land degradation and ~~affect regular land development~~ (Sun et al., 2012). ~~Soil~~ ~~According to Miao et al. (2010), soil~~ erosion in ~~the~~ Chinese Loess Plateau is serious ~~(Miao et al., 2010), the~~. ~~The~~ annual average soil loss ~~amount~~ in this region is ~~about~~ 1600

Gg, and the annual erosion amount of surface soil in the most seriously affected areas reaches 20 mm or more (Rudi & VietorHessel and Jetten, 2007). Recent studies on the Loess Plateau are mainly focused on the water erosion control in the water-wind crisscrossed erosion region, soil quality indicators in relation to land use and topography, overland flow on abandoned slopes, effects of long-term fertiliser applications on soil organic carbon and hydraulic properties, soil water content, interrill erosion on unpaved roads, and temporal variations of flow-sediment relationships (Zhao et al., 2015; Zhao et al., 2016a; Yu et al., 2016; Shi et al., 2016; Li et al., 2016a, 2016b; Cao et al., 2015; Yu et al., 2015; Gao et al., 2016). But there is little research on the distributed-dynamic simulation of erosion and sediment yield at watershed scales.

Majiagou River watershed belongs to the first grade tributary of the Yanhe River, ~~it~~. It is located in the typical hilly and gully region of the Loess Plateau (Li, 2009), ~~its with a particular~~ topography and geomorphology ~~have very strong representative,~~ ~~it~~. It is one of the ~~is one of the serious soil and water loss~~ regions in the middle reaches of the Yellow River more seriously affected by soil loss (Fu et al., 2010; Jia et al., 2014). Before the implementation of China's returning farmland policy in 1997 (Zhao et al. 2016b), the soil erosion area in Majiagou River watershed reached 72.31 km<sup>2</sup>, which accounts for 98% of the total watershed area, ~~the soil erosion modulus~~. Soil erosion rate was up to 8740 ~~Mg/(km<sup>2</sup>·a)~~ Mg km<sup>-2</sup> year<sup>-2</sup>, it belongs to the very intensive soil erosion region (Dang et al., 2013). After the implementation of returning farmland to forestland project for nearly 10 years, the soil erosion ~~modulus~~rate of the Majiagou River watershed decreased to 5700 ~~Mg/(km<sup>2</sup>·a)~~ Mg km<sup>-2</sup> year<sup>-2</sup> in 2008 (Wu et al., 2010). Therefore, it is necessary to track spatiotemporal evolutions of erosion and sediment yield in the Majiagou River watershed, and results may provide reference for scientific management of land resources and reasonable planning of soil and water conservation measures.

Under the international background of serious soil loss, ~~the researches~~research on monitoring, modelling and ~~the most other~~ advanced ~~technology-technologies~~ ~~have-has~~ developed rapidly in the world (Chen & Cui 2006; Cui et al., 2013; Borrelli et al., 2015). In the field of experimental study, the earliest quantitative study of soil erosion ~~quantitative observation-began~~ in 1912 (Meyer, 1984), the related scholars in the world carried out long-term experimental studies in the runoff plot under rainfall and natural status (Xia et al., 1998; Zhou et al., 2000; Yu et al., 2009; Chen et al., 2010), which provides the scientific basis for the study of soil erosion and the theoretical supporting for the development of factor analysis model. In the field of model study, soil erosion models may be divided into factor analysis ~~model~~ (empirical statistical models) and physical-mechanism process models (Zhou & Shangguan, 2004; Cao et al., 2015) ~~according to different modelling ideas~~. The factor analysis model is simple and intuitive, ~~it and~~ can be modified according to the specific application area. The typical representative is the USLE and its ~~modified form~~revised version (RUSLE) (Wischmeier & Smith, 1965, 1978; Renard et al., 1997; Xie et al., 2003; Wang & Lu 2004; Sadeghi & Mizuyama, 2007), which have been widely used ~~in the world~~ (Liu et al., 2001, 2002; Fu et al., 2001; Yin & Chen, 1989; Wang et al., 1996; Cheng et al., 2009; Arekhi et al., 2012; Ligonja & Shrestha 2015). ~~In the field of~~Regarding physically-based models, ~~the soil erosion model~~they may be

**Comment [AJL1]:** Just a suggestion. Although “a” is correct for annum (year), according to the International System of Units, I suggest using “year” to avoid confusion. Using parentheses in these expressions is not good. Here, and through the manuscript, please change “Mg/(km<sup>2</sup>·a)” with “Mg km<sup>-2</sup> a<sup>-1</sup>” (or “Mg km<sup>-2</sup> year<sup>-1</sup>”).

divided into four main processes including precipitation sputtering, migration, runoff dispersing, and sediment transport (Wang et al., 2008). Meyer (1984) established the theory of shallow gully erosion in 1972 (Meyer, 1984), and Foster (1980) proposed the a physical-based soil erosion model in 1980 (Foster, 1980). The United States Department of Agriculture (USDA) introduced the WEPP model in 1995. At the same time, in Europe and Australia there are some classic physical process-process-based models, such as the Holland LISEM model, the British EUROSEM model and the Australian GUEST, were developed model. Since 1980, Chinese scholars have successively established the soil erosion prediction models with local characteristics (Mou & Meng, 1983; Yang et al., 2008; Tang, 1996; Cai et al., 1996; Fan, 1985; Yang et al., 2007). With the development of modern information technology, the distributed and dynamic models have been developed and applied gradually. In the field of distributed model, the typical soil erosion distributed models mainly include SHE model, IHDM model and EUROSEM models (Wang et al., 2003). In particular, some of the agricultural non-point source pollution evaluation models such as SWAT and AGNPS also embed-include soil erosion evaluation modules (Zhang et al., 2007; Li et al., 2009). Dynamic models for soil erosion of small-scale watershed systems also have a wide application value (Tang & Chen, 1997; Gao & Lei Peiling and Tingwu, 2010; Liao et al., 2012), the. The most representative dynamic model is KINEROS, model which simulates storm event-based sediment processes (Singh et al., 1999). In recent years, the researches of research on soil erosion has evolved rapidly with new computer-based technologies, with the advanced technology such as GIS and RS, BP neural networks, genetic algorithm and fruit fly algorithms have developed rapidly great progress (Zhao et al., 2004; Dai et al., 2008; Ochoa-Cueva et al., 2015). They can realize the These can make real-time accurate simulations with high accuracy and assess the quantitative assessment of spatiotemporal evolutions changes (Caro & Legarda, 2013). In short, with the development and popularization of information technology, GIS/RS technology and computing technology, the distributed research on the watershed sediment yield has become an inevitable trend, and the dynamic simulation has also become a necessary means to track temporal variations of erosion and sediment yield (Yao & Xiao, 2012). However, the existing distributed-dynamic model takes models which focus on event-based rainfall processes as the research object, there is very little involved in are not suitable to assess inter-annual variability of erosion and sediment yields, and there is still less scholar who in-depth considers research hardly considers the effects of upstream/downstream interactions on soil erosion and sediment yields at watershed scales, relationships between upstream and downstream on dynamic changes of erosion and sediment yield in a watershed. Therefore, the objectives of this study are [i] to establish and modify a yearly distributed model of watershed erosion and sediment yield, and [ii] to evaluate spatiotemporal evolutions changes of erosion and sediment yield before and after returning farmland projects in the Majiagou River watershed. Results may provide reliable scientific basis for the dynamic simulation-modelling of multi-scale erosion and sediment yield, land use planning and watershed management.

**Comment [AJL2]:** I do not understand this. Do you mean raindrop impacts?

**Comment [AJL3]:** This is not in the reference list. Do you mean Caro et al. (2012)?

## 2. Material and ~~Methods~~ methods

### 2.1 Study area

Majiagou River, ~~which is~~ located in the western Ansai County of Yanan city, Northern Shaanxi Province (China), is one of the first grade tributaries of the Yanhe River (Fig.1). It flows into the Yanhe River in Ansai County from the northwest to the southeast. ~~The main channel is about 17.4 km in length, and the average gully slope is about 6.5%. The watershed, with a total catchment area of (73.83 km<sup>2</sup>), is situated on the typical hilly and gully region of the Loess Plateau (northern China; 109° 9 30 ~ 109° 18 59 E and 36° 49 42 ~ 36° 56 42 N). The watershed belongs to a warm-temperature and semi-arid continental monsoon climate. The evaporation capacity is ~~greater than~~ above 1000 mm, the annual average temperature is 6-11°C. ~~The average annual average precipitation is about 500 mm, the precipitation in 6-10 months accounts for about 80% of the total annual precipitation with 80% of rainfall concentrated between May and October. Normally, precipitation occurs as intense and short storms, which favor the rapid formation of runoff, which greatly increases the risk of water erosion and flooding. The precipitation form is mainly heavy rainstorm with characteristics of high intensity and short duration, which will easily produce a large number of surface runoff under excess infiltration, and then leads to hyperconcentrated flood disaster under the action of water erosion.~~~~

### 2.2 Environmental database

The parameters included in this study include digital elevation model (DEM), daily precipitation data, runoff, soil properties, land use types (Figs. 2 and 3; Table 1).

### 2.3 Dynamic model of erosion and sediment yield

~~Soil loss is the comprehensive results of various natural and human factors. Accelerated erosion risk is the result of different natural and anthropic factors~~ (Fu et al., 2014; Tian et al., 2016). Climate, soil, topography and vegetation are the natural factors affecting soil loss (Zhao et al., 2013). ~~The irrational/Inadequate~~ land use, the destruction of forest and grass, ~~excessive unsuitable~~ reclamation and overgrazing, cultivation on steep slopes, mining, road construction and unreasonable waste soil and residue treatments are the main human factors affecting soil loss (Chen & Lv, 2012). Based on the USLE/RUSLE equations, the Chinese soil loss equation (CSLE) model put forward by Liu Baoyuan was selected and applied to quantitatively evaluate soil erosion of the Majiagou River watershed. The basic expression is as follows,

$$Q = A \times R \times K \times L \times S \times B \times E \times T \quad (1)$$

where  $Q$  is the annual average soil erosion rate, (Mg km<sup>-2</sup> year<sup>-1</sup>/~~hm<sup>2</sup>-a~~);  $A$  is the catchment area, hm<sup>2</sup>;  $R$  is the rainfall erosivity factor, (MJ·mm/hm<sup>2</sup>·h·a);  $K$  is the soil erodibility factor, (tMg·hm<sup>2</sup>·h/hm<sup>2</sup>·MJ·mm);  $L$  is the slope length factor;  $S$  is the slope gradient factor;  $B$  is the biological measure factor (equivalent to factor C of the RUSLE equation);  $E$  is the

Formatted: English (U.K.)

Comment [AJL4]: Not in the reference list. Provide a reference.

engineering measure factor;  $T$  is the tillage measure factor.

Because not all eroded soil is actually delivered to the basin outlet, based on the equation (1) and the sediment delivery ratio factor, the annual average sediment yield can be estimated by the Eq. (2).

$$Q_s = A \times R \times K \times L \times S \times B \times E \times T \times \lambda \quad (2)$$

5 However, the Eq. (2) is the multi-year average sediment yield amount, it is not a dynamic changing expression. Furthermore, the dynamic-continuous modeling studies on the processes of sediment yield are very critical and necessary for accurately estimating annual changing trends of sediment yields (Gessesse et al., 2015). Rainfall runoff and human activity are two important factors affecting erosion and sediment yield (Mu et al., 2012; Liu et al., 2014; Lieskovský & Kenderessy 2014). According to the related study results (Long et al., 2008; Liu, 2009; Miao et al., 2012), the rainfall erosivity factor and the sediment delivery ratio factor affected by hydrological elements were defined as the dynamic hydrological factor; the biological measures, engineering measures, tillage measures and the sediment delivery ratio factor affected by human activities were designed as the dynamic land management factor, so the dynamic equation of sediment yield suitable for the hilly and gully region of Loess Plateau was put forward as follows,

$$Q_{s,i} = A \times K \times LS \times (R_i \times \lambda_{q,i}) \times (B_i \times E_i \times T_i \times \lambda_{m,i}) \quad (3)$$

15 where subscript  $i$  represents the  $i$ -th year, Supposing that the factor  $Q_{s,i}$  can be divided approximately into the product of  $q_{i}$  related only to hydrological conditions and  $m_i$  related only to land management measures.

Impacts of hydrological elements on sediment transport are mainly manifested in the moving action transport of sediments from erosion sources to the river courses by rainfall runoff surface runoff flow (Mu et al., 2012).  $q_i$  can be estimated by the sediment transport capacity that is widely used in hillslope and fluvial geomorphology (Prosser & Rustomji Prosser and Rustomji 2000). According to the general situation of the study area,  $q_i$  can be supposed as follows,

$$\lambda_{q,i} = \frac{TC_i}{TC} = \frac{k \times q_i^a \times s^b}{k \times q^a \times s^b} = \left( \frac{q_i}{q} \right)^{1.45} \quad (4)$$

where  $TC$  is the average sediment transport capacity per unit width of slope ( $\text{kg m}^{-3}$ );  $q$  is the average runoff amount per unit width ( $\text{m}^{-3}$ );  $k$ ,  $a$  and  $b$  are coefficients. Those coefficients and the surface gradient factor  $S$  are constants when there are no changes in underlying surfaces of runoff.

25 Impacts of human activities on sediment transport are mainly demonstrated in water and sediment reduction effects by all kinds of water conservation measures (Schilling et al., 2011; Sarma et al., 2015). Under the annual changing conditions of  $m_i$ ,  $B$ ,  $E$  and  $T$ , the dynamic land management factor was introduced and defined as,

$$Y_i = \frac{B_i \times E_i \times T_i \times \lambda_{m,i}}{B \times E \times T \times \lambda_m} \quad (5)$$

**Comment [AJL5]:** I do not understand this. Please, reword.

**Comment [AJL6]:** In the next lines, explain what is the meaning of  $\lambda$ .

**Comment [AJL7]:** Do you mean "calculates the multi-year...?"

**Comment [AJL8]:** Erosive processes?

**Comment [AJL9]:** Delete. This is obvious and is not part of methods. Delete also cited references.

**Comment [AJL10]:** Not a peer reviewed source.

**Comment [AJL11]:** By?

**Comment [AJL12]:** I do not understand.

**Comment [AJL13]:** Delete.

According to Xu et al. (2012), ~~who studied the evolution of runoff and sediment load of Yanhe River basin between 1956 and 2009, research results of 1956-2009 runoff and sediment characteristics in the Yanhe River watershed, the year of 1956-1969~~the period between 1956 and 1969 is a sporadic governance stage with little intervention of human activities, the intervention is only 0.9-3.9% and ~~fluctuations of runoff and sediment are mainly caused by fluctuations of natural rainfall;~~ ~~after. After~~ this stage, human land management activities gradually ~~become-became~~ the main driving force for changes of runoff and sediment, soil and water conservation ~~measures~~ are the main factors leading to reduction of runoff and sediment (Gao et al., 2010; Li et al., 2011). In order to quantitatively study impacts of human land management activities on the sediment transport process, this study ~~takes~~ the year of 1956-1969 as the base period, and the years after the 1970s ~~have been~~ defined as the governance period (Wang et al., ~~2015~~2016). ~~Based on the related literatures (Wang & Fan, 2002)~~In agreement with Wang and Fan (2002), the fitting relationship expression ( $R^2=0.912$ ) of runoff and sediment in Ganguyi hydrological station in 1954-1969 was taken as the denominator, and the fitting relationship expression ( $R^2=0.857$ ) of runoff and sediment in 1954-1989 as the numerator. The ratio of sediment yield ~~amount between~~ the governance period and the base period was defined as the dynamic influencing factor ~~which reflects~~ effects of human land management activities on yearly changes of watershed sediment transport. The expression is,

$$y_i = \frac{y_{g,i}}{y_{b,i}} = \frac{0.449x_i - 5062.6}{0.4436x_i - 4559.9} \quad (6)$$

where  $x_i$  ~~represents is~~ the runoff amount in the  $i$ -th year ( $10^4 \text{ m}^3$ ),  $n$  is the number of years,  $y_{g,i}$  ~~represents is~~ the sediment amount in the  $i$ -th year during the governance period ( $10^4 \text{ m}^3$ ), ~~and~~  $y_{b,i}$  ~~represents is~~ the sediment amount in the  $i$ -th year during the base period ( $10^4 \text{ m}^3$ )

In summary, the dynamic model of erosion and sediment yield was determined as follows,

$$Q_{s,i} = y_i \times \left( \frac{q_i}{q} \right)^{1.45} \times R_i \times \} \times A \times K \times LS \times B \times E \times T \quad (7)$$

where  $\frac{q_i}{q}$  ~~represents is~~ the average sediment delivery ratio,  $B$ ,  $E$  and  $T$  represent the average value of the watershed for many years.

## 2.4 Determination of model factors

### 2.4.1 The rainfall erosivity factor

Rainfall erosivity ~~refers to is~~ the potential ~~capacity-erosive force of rainfall~~of soil erosion caused by rainfall. ~~Scholars in the world~~ Different authors have proposed simple algorithms of rainfall erosivity in different forms, ~~where the half-month~~

**Comment [AJL14]:** Percentages of what?

**Comment [AJL15]:** Delete. This statement does not provide interesting information here.

**Comment [AJL16]:** This is not in the equation, please, delete.

rainfall erosivity model shows the seasonal distribution of rainfall erosivity by the period of half month. In this study, a half-month simple algorithm of rainfall erosivity established by Zhang et al. (2003)(Zhang et al., 2003) was applied to estimate the monthly and annual rainfall erosivity, the half-month algorithm of rainfall erosivity estimated by daily precipitation is as follows calculated as:

$$R_i = r \sum_{j=1}^k (P_j)^s \quad (8)$$

$$S = 0.8363 + \frac{18.144}{P_{d12}} + \frac{24.455}{P_{y12}} \quad (9)$$

$$r = 21.586S^{-7.1891} \quad (10)$$

where  $R_i$  represents is the rainfall erosivity value in  $i$ -th half-month period ( $\text{MJ}\cdot\text{mm}\cdot\text{hm}^{-2}\cdot\text{h}^{-1}$ ),  $k$  represents is the number of days within the half-month period,  $P_j$  is the rainfall in the  $j$ -th day during the half-month period (the erosive rainfall standard 12mm),  $P_{d12}$  represents is the average daily rainfall when the daily rainfall  $\geq 12\text{mm}$ , and  $P_{y12}$  represents is the average annual rainfall when the daily rainfall  $\geq 12\text{mm}$ . In this algorithm, the half-month division standard is that the first 15 days of each month are used as the former half-month period, and the remaining days of this month as the other half-month period.

According to the above algorithm, the annual dynamic results of  $R$  factor in the Majiagou River watershed are determined in Table 2, and spatial distributions of the average annual rainfall erosivity are spatially interpolated and shown in Figure 4. Table 2 shows that most of the rainfall erosivity values in the hilly and gully region of Loess Plateau are all below 2000  $\text{MJ}\cdot\text{mm}/\text{hm}^2\cdot\text{h}\cdot\text{a}$  (Table 2). However, Yan'an suffered a once-in-a-century storm attack in July 2013, which is the key reason for abnormally large rainfall erosivity value of the Majiagou River watershed in 2013.

#### 2)2.4.2 Soil erodibility factor

Soil erodibility is used to characterize properties whether the soil is susceptible to erosion, it embodies the sensitivity of the soil to the separation and handling of erosion (Lu et al., 2011). The modified method presented by Zhang et al. (2007) was applied to calculate the factor  $K$  values, the formula is According to Zhang et al. (2007), the soil erodibility factor ( $K$ ) is calculated as:

$$K = 0.74488K_n - 0.03336 \quad (11)$$

$$K_n = [2.1 \times 10^{-4} M^{1.14} (12 - OM) + 3.25(SSC - 2) + 2.5(PL - 3)] / 100 \quad (12)$$

where  $M$  is calculated by the formula of particle mass fraction of  $(0.002\sim 0.1\text{mm}) \times (\text{particle mass fraction of } (>0.002\sim 0.05\text{mm}) + \text{particle mass fraction of } (>0.05\sim 2\text{mm}))$ ;  $OM$  is the soil organic matter content, g/kg;  $SSC$  is the structural coefficient;  $PL$  is the permeability level.

Comment [AJL17]: I think this can be deleted, but you decide.

Comment [AJL18]: Delete.

Based on the soil quality survey results of the study area (Table 1), the average  $K$  value of soil erodibility in the watershed was calculated as  $0.0542 \text{ Mg}\cdot\text{h}\cdot\text{MJ}^{-1}\cdot\text{mm}^{-1}$ , which is close to the research results reported by Li & Zheng (2012) in the Yanhe River basin. The soil in the study area is focused on loessial soil, the  $K$  values of different soil types were calculated by the above equations. Under the GIS-aided analysis conditions, different  $K$  values were added to the attribute table of soil map as a column attribute value, then the vector map will be converted to raster map based on  $K$  value field. Finally the spatial distribution map of soil erodibility factor in the Majiagou River watershed was presented in Figure 4.

### 2.4.3 Topography factor

Topography is an important factor affecting soil erosion.  $LS$  factor reflects the influencing degree of terrain factors to soil erosion, it can be divided into slope length factor and slope gradient factors. Many scholars/authors have established suggested empirical formulas used for quantitative analysis according to the standard definition of  $LS$  factor (Wang, 2007).

Through comprehensive comparison analysis, the slope length factor ( $L$ ) in this study was estimated by the below equation,

$$L = \left( \frac{\alpha}{22.13} \right)^r \quad (13)$$

where  $\alpha$  is the horizontal slope length;  $r$  is the slope length index.  $\alpha$  is calculated as:

$$r = \frac{S}{S + 1} \quad (14)$$

Where  $\beta$  is calculated as:

$$S = \left( \frac{\sin \theta}{0.0896} \right) / \left[ 3.0(\sin \theta)^{0.8} + 0.56 \right] \quad (15)$$

where  $\alpha$  is the horizontal slope length;  $r$  is the slope length index; where  $\theta$  is the slope gradient ( $^\circ$ ).

The slope gradient factor ( $S$ ) in this study was calculated using piecewise method. Considering this mountainous terrain of the watershed, the gentle slope used the formula proposed by McCool et al. (1987), and the steep slope adopted the formula proposed by Liu et al. (2010), the specific expressions are as follows.

$$\begin{aligned} S &= 10.8 \sin \theta + 0.03 & \theta < 5^\circ \\ S &= 16.8 \sin \theta - 0.05 & 5^\circ \leq \theta \leq 10^\circ \\ S &= 21.9 \sin \theta - 0.96 & \theta > 10^\circ \end{aligned} \quad (16)$$

where  $\theta$  is the slope gradient ( $^\circ$ ).

In this study, the multi-year average  $LS$  value from the Majiagou River watershed is determined as 12.9 based on the existing previous research results (Wang 2007). In addition, according to the above GIS-based extraction algorithm of slope gradient and slope length, the grid layers of slope gradient and slope length in the study area were extracted from the 30m resolution DEM, and then the topography factor was spatially calculated by the optimal calculation formula of the slope

**Comment [AJL19]:** Not peer-reviewed source. Try to find another reference to support this statement if possible.

**Comment [AJL20]:** Please, reword.

**Comment [AJL21]:** Not a peer-reviewed source. Try to find another reference to support this statement.



gradient factor and the slope length factor. The spatial distribution layer of *LS* factor in the study area is shown in Figure 4.

#### 4)2.4.4 *BET* factor

Biological *measure*-factor (*B* factor) refers to the ratio of soil erosion amount between the standard plot for growing crops and for continuous abandonment within a certain time under the same conditions (Wischmeier & Smith, 1965), its value changes and varies between 0 and 1. Soil and water conservation engineering *measure*-factor (*E* factor) is defined as the ratio of the soil erosion amount between engineering measures and non engineering measures (Qin, 2013). Tillage *measure*-factor (*T* factor) is the ratio of the soil erosion amount between the certain tillage tillaged farmland and the continuous relaxation bare land under the same conditions, its value is also and varies between 0 and 1 (Guo et al., 2013).

Considering the synchronization of human activities on underlying surface conditions between the Majiagou River watershed and the Yanhe River basin, based on the related research results of *B*, *E* and *T* factors in the Loess hilly area (Xie, 2008; Zhang et al., 2012; Qin, 2013), 0.1562, 0.497 and 0.712 values were assigned respectively. The average *B*, *E* and *T* values of the Majiagou River watershed for many years were in turn assigned to 0.1562, 0.497 and 0.712. Besides, the The spatial distribution of the average *BET* factor for many years is were spatially calculated and shown in Figure 4 (Figure 4).

#### 5)2.4.5 The sediment delivery ratio (*SDR*)

Reference to systematic research results of erosion and sediment yield in the Loess Plateau (Jing et al., 2005) According to Jing et al. (2005), there are different fluctuations for the annual *SDR* values of the Majiagou River watershed, the with average value is around 0.9. Furthermore, considering the research results of the Yanhe River basin by Zhu et al. (2007), a *SDR* value of 0.92 for many years was determined as the average *SDR* value of the Majiagou River watershed (Zhu et al., 2007).

### 3. Results and Discussion

#### 3.1 Validation of erosion and sediment yield

Considering the very similar climate and underlying surface conditions, the soil erosion modulus rate in the study area has a certain comparability with the Yanhe River watershed, the previous research results of Yanhe River watershed can be used to verify this our results. According to the dynamic simulation results of soil erosion in the Yanhe River watershed from 2001 to 2010 reported by Li & and Zheng (2012) dynamic simulation results of soil erosion in the Yanhe River watershed from 2001 to 2010, the annual average erosion modulus rate of Yanhe River watershed is  $5812.28 \text{ Mg km}^{-2} \text{ year}^{-2} / (\text{km}^2 \cdot \text{a})$ , it has little difference with the average simulated value of  $6307.86 \text{ Mg km}^{-2} \text{ year}^{-2} / (\text{km}^2 \cdot \text{a})$  in the Majiagou River watershed from 1995 to 2012, the relative error is comparatively small; the The annual erosion modulus rate of the Majiagou River watershed in 2008 alone is  $2485.46 \text{ t} / (\text{km}^2 \cdot \text{a}) \text{ Mg km}^{-2} \text{ year}^{-2}$ , and the corresponding simulated value is  $2278.2 \text{ Mg km}^{-2}$

**Comment [AJL22]:** I suggest the extended form, not the abbreviated one. May be "Biological factor"?

**Comment [AJL23]:** I suggest: "the cropped plot".

**Comment [AJL24]:** I suggest: "the abandoned plot".

**Comment [AJL25]:** Not a peer-reviewed source.

**Comment [AJL26]:** "Not cultivated soil"?

**Comment [AJL27]:** Not a peer-reviewed source.

**Comment [AJL28]:** How many?

~~year<sup>-2</sup>t/(km<sup>2</sup>.a), the relative error is with relative error 8.34%; the above~~ These results demonstrate that the dynamic erosion and sediment yield model has scientific rationality and good reliability; ~~this.~~ This study results can be used for adsorbed NPS pollution load estimation.

In addition, ~~the~~ previous research results of sediment variations in Ganguyi hydrological station ~~from between 1961 to and~~ 2012 (Ren et al., 2012) and the simulation results of sediment yield in this study ~~were also comparatively~~ confirmed that the sediment yield ~~both~~ showed a decreasing trend although there were fluctuations of different degrees in individual years (Fig. 5), it indicates that the overall changing trends of sediment yield in the study area are consistent with the background of returning farmland policy (Zhao et al., 2013), the current simulation accuracy basically meets the requirements of changing tendency evaluation. However, ~~it can also be seen from Fig. 5 that~~ the model largely fails for the individual events especially after 2006 when the simulated values are distinctly different from the observed values (Fig. 5). The main reason ~~can roughly be summed up for this may be~~ that ~~the~~ sediment transport processes in the established model may not clearly reflect spatiotemporal variations of the watershed underlying surface, especially for the physically-based complex sediment yield relationship between the upper and lower reaches areas of the watershed after returning farmland.

Therefore, it is necessary to modify the above established model, ~~the.~~ The influencing factor considering relationships the upper and lower reaches of the watershed was introduced to further improve the accuracy of the established sediment yield model. According to the existing research results (Xie 2012; Xie & Li 2012), Eq. (7) can be changed into the following formula,

$$Q_{s,i} = \frac{Q_{w,i}}{Q_i - Q_{b,i}} \times y_i \times \left( \frac{q_i}{q} \right)^{1.45} \times R_i \times \} \times A \times K \times LS \times B \times E \times T \quad (17)$$

where  $Q_{w,i}$  is the annual saturated water when the saturated sediment transport amount is the observed sediment transport amount in a hydrological station,  $Q_{b,i}$  is the annual base flow,  $Q_i$  is the observed annual runoff amount.

For the Ganguyi hydrological station, the simulated value of the annual average sediment yield ~~modulus rate after model modification~~ from 1995 to 2012 has changed from 5803.23 t/(km<sup>2</sup>.a) to 4510.66 t/(km<sup>2</sup>.a) ~~during between 1995 and 2012 period.~~ The observed value in the Ganguyi hydrological station of the Yanhe River watershed is 3411.53 t/(km<sup>2</sup>.a), the relative error of the modified model decreases by 30-40% (Fig. 6). For Ansai and Zaoyuan hydrological station, the simulation results after modification also improved a lot.

### 3.2 Spatiotemporal evolutions of soil erosion gradations

Figure 7 shows spatial distribution of soil erosion gradations of the Majiagou River watershed in 1995 and 2010. The annual average soil erosion ~~modulus rate~~ of the Majiagou River watershed is 6307.86 ~~Mg km<sup>-2</sup> year<sup>-2</sup>. t/(km<sup>2</sup>.a), the soil erosion~~

Comment [AJL29]: Not peer-reviewed.

belongs to intensive erosion based on standards for classification and gradation of soil erosion (SL 190-2007), it confirms that the current situation of soil and water loss in the study area is serious and erosion control measures and adequate management plans for soil and water resources are necessary in this hilly and gully region, it also indicates that it is vigorously necessary for the protection and management of soil and water resources in the hilly and gully region.

5 Although there are not large variations in the overall spatial distribution of soil erosion between 1995 and 2010, small differences in the intensity of soil erosion rates are observed (Table 3). The area with very low to moderately low erosion rates decreased from 55.41 to 46.93  $\text{Mg km}^{-2} \text{ year}^{-2}$  between 1995 and 2010 in the Maiagou River watershed (approximately 8.48% of the total area). In contrast, the area under moderate to extreme soil erosion rates increased from 44.59 to 53.07  $\text{Mg km}^{-2} \text{ year}^{-2}$  during the same period. Although the overall spatial distribution patterns of soil erosion in two typical years of 10 1995 and 2010 are generally the same, there is a little difference for the gradation distribution of soil erosion (Table 3). Compared with 1995, there was a slight decline in the micro and mild erosion occurrence area of the Majiagou River watershed in 2010, the reduction area accounts for 8.48% of the watershed area. However, the area of moderate and above moderate erosion in 2010 increased by 8.48% than that in 1995, among them the area of intensive erosion increased more obvious and the corresponding increasing range was 4.22%. The above results indicate that spatiotemporal evolutions of soil 15 erosion intensity in the watershed are closely related to temporal and spatial distributions of rainfall intensity, rainfall duration, rainfall amount and land use patterns. The long-duration concentrated rainfall in 2010 results in a little higher erosion intensity than 1995 in and easily-eroded sloping farmland, it. It also shows that the current soil and water conservation measures are not very ideal suitable for high rainfall intensity, and the results. Results potentially emphasize the necessity of further efforts on land resources management.

### 20 3.3 Temporal evolutions of sediment yield

Figure 8 shows that the sediment transport amount in the study area has an overall decreasing trend from 1995 to 2012 (Figure 8), the. The average sediment transport modulus before and after model modification in recent 5 years (in addition to 2013) is 4574.62  $\text{Mg km}^{-2}$  and 1696.1  $\text{Mg km}^{-2}$  respectively, it. It has decreased by about 35.4% and 78.2% compared with the of sediment transport from the early governance period (1995-1998). Results show that the 25 modified model is more accordance with practical circumstances, the main reasons for the decreasing sediment yield mainly result from water and soil conservation measures for regular rainfall events. Since the late 1990s, China has gradually carried out construction projects of returning farmland to forestland land use changes, beautiful mountains and rivers, warp-land dam engineering and terracing of Yanhe River, funded by the by-World Bank loan in Northern Shaanxi. A lot of targeted soil and water conservation measures were implemented for coping with serious soil and water loss situation of in the 30 Yanhe River basin, this project improves have contributed to improve underlying surface conditions and reduces to reduce

Formatted: Not Superscript/ Subscript

soil erosion disasters. Especially after 2003, ~~the~~ sediment transport in the study area not only had an overall decrease trend, but also ~~the tendency of~~ inter-annual fluctuations ~~was/were~~ small and the whole sediment transport level was low. It also fully **indicates** that the effective implementation of soil and water conservation measures and the continuous improvement of underlying surface conditions have significant benefits of water and sediment **reduction** (Ran et al., 2006).

5 Soil and nutrient loss in the Loess Plateau **mainly results from** few transient rainstorms (Zhang et al., 2004; Austin et al., 2004). But **only** serious soil erosion hazards in the study area due to the once-in-a-century storm ~~encountered-observed~~ in 2013 can not reflect the general sediment yield evolutions. Figure 9 shows the monthly **sediment yield** dynamics in 2013, ~~it~~. **It** can be seen that the monthly distribution of sediment transport in the **watershed** is very uneven, and the maximum values of **rainfall erosivity** and sediment both occurred in July, the sediment transport capacity in July **alone** accounted for **96.18%**.

10 The reason for this is that ~~the rainfall erosivity~~**rainfall-induced erosion value** in July accounted for 80.49% of the whole year, and it is 3.11 times more than the corresponding average value for many years, ~~thus~~. **Thus** a powerful hydraulic erosion force was formed due to the once-in-a-century storm. ~~By~~ **According to the statistics** the corresponding monthly runoff in the **watershed** also accounted for 56.22% of the total annual runoff, and it accounted for 76.79% of the multi-year average runoff amount in the Majiagou River watershed. ~~Since this the~~**The** corresponding monthly **sediment yield modulus** reached 44.5  
15 times more than the average annual sediment yield **modulus**. Therefore, the once-in-a-century storm in July 2013 is the main reason for the maximum sediment yield level, ~~it also and~~ shows that **non-non-conventional storm** plays a very **critical** role on the evolution process of erosion and sediment yield.

The **above** analysis of ~~the~~ sediment transport **dynamics** indicates that rainfall and human activity are two main factors affecting dynamic changes of soil erosion (Yao et al., 2011). Rainfall is the promotion factor for erosion evolution, it can  
20 affect the formation and development of soil erosion process by splash effects of raindrops and erosion moving of rainfall runoff. The positive human activities are the restraining factors for erosion evolution, ~~they can increase~~**increasing** vegetation cover, ~~consolidate-consolidating~~ soil, weaken soil erosivity, and strengthening **ing** effects of interception ~~and hindrance~~.

### 3.4 Spatial evolutions of sediment yield

~~Figure 10 shows spatial distributions of the sediment yield modulus in the Majiagou River watershed in 1995 and 2010.~~ Due  
25 to widely distributed sloping farmland along river banks, bank erosion dominated sediment sources of the Majiagou River watershed, and peak values of the sediment yield **modulus** also mainly appears on ~~the main river banks of the whole Majiagou watershed from northwest to southeast~~**these areas** (Figure 10). According to statistical analysis, the change of farmland area between 1995 and 2010 is small, while the area of forestland in 2010 increased by about 2.2% than in 1995.  
**The spatial distribution map of soil erosion in these two years also suggests that soil erosion significantly reduced due to changes of vegetation cover and flow path, and the increase of vegetation cover (forestland) in the steep sloping land is**

**Comment [AJL30]:** 96.18% of what?

stronger than the gently sloping farmland, which results in changes of watershed sediment distribution pattern. Through the comparative analysis, the spatial results of this study are basically consistent with the results of Zhu et al. (2016). In general, spatial and temporal variations of sediment transport in the watershed are generally related to spatial distribution of land use types, the large spatial variations of sediment transport are also closely associated with spatial changes of topography and soil (Gao et al., 2016).

#### 4. Conclusions

1) A distributed-dynamic sediment yield model based on the CSLE equation was modified and verified to investigate impacts of returning farmland on erosion and sediment yield in the Majiagou River watershed from 1995 to 2013. Results indicate that the overall status of the watershed belongs to intensive erosion under intense erosion risk. After changes carried out in the watershed, multi-year average soil erosion value after modification in the watershed decreased by about 8% compared to the level before modification. Spatiotemporal evolutions of soil erosion gradation in the watershed are closely related to distributions of rainfall intensity, rainfall amount, and land use patterns.

2) The multi-year average sediment yield decreased from 5803.23 (before modifications in the Majiagou River watershed) to 4510.66  $\text{Mg km}^{-2}$  (after modifications). Modulus before and after modification in the Majiagou River watershed was 5803.23  $\text{Mg km}^{-2}$  and 4510.66  $\text{Mg km}^{-2}$  respectively, the annual sediment yield tracked to an overall decreasing trend from 1995 to 2012 generally decreased between 1995 and 2012. After 2003, the annual sediment transport in the study area was especially diminishingly decreased sharply. The fluctuation trend is weak and the overall sediment yield level is relatively low, and the average sediment yield modulus before and after model modification in recent 5 years (in addition to 2013) is 4574.62  $\text{Mg km}^{-2}$  and 1696.1  $\text{Mg km}^{-2}$ , it has respectively decreased by about 35.4% and 78.2% compared with the early governance (1995-1998).

3) The implementation of large-scale soil and water conservation projects in the late 90's of last century has continuously improved sediment situation of the watershed, but the changing trend of event-based rainfall is still grim and it urgently needs to continuously increase the level of integrated watershed management. In particular, the extreme storms will lead to large fluctuations of sediment yield. For example, the once-in-a-century storm of Yan'an city in July 2013 is the most important factor for the appearance of maximum sediment yield ( $1983.36 \times 10^4 \text{ Mg km}^{-2}$ ) in the watershed. Therefore, the current soil and water conservation measures are not very ideal suitable for high rainfall intensity observed in July 2013, and the results potentially emphasize the necessity of making further efforts on soil and water resources management in the easily eroded sloping farmland of hilly and gully regions of the Chinese Loess Plateau.

## Acknowledgements

This study was supported by the National Natural Science Foundation of China (51309194, 51679206), the Fundamental Research Funds for the Central Universities (2452016120), Special Research Foundation for Young teachers (2452015374), the open foundation of State Key Laboratory, Institute of Water and Soil Conservation, Chinese Academy of Sciences and Ministry of Water Resources (K318009902-1417), the Doctoral Fund of Ministry of Education of China (20130204120034), the Initial Scientific Research Funds for PhD from Northwest A&F University (2012BSJJ004), the Fundamental Research Funds for the Central Universities (QN2013047).

## References

- Arekhi, S., Shabani, A., and Rostamizad, G.: Application of the modified universal soil loss equation (MUSLE) in prediction of sediment yield (Case study: Kengir Watershed, Iran). *Arabian Journal of Geosciences*, 5:1259-1267, 2012.
- Austin, A.T., Yahdjian, L., Stark, J.M., Belnap, J., Porporato, A., Norton, U., Ravetta, D.A., and Schaeffer, S.M.: Water pulses and biogeochemical cycles in arid and semiarid ecosystems. *Oecologia*, 141: 221-235, 2004.
- Borrelli, P., Märker, M., and Schütt, B.: Modelling Post-Tree-Harvesting soil erosion and sediment deposition potential in the turano river basin (Italian central Apennine). [Land Degradation and Development](#) *Land Degradation & Development*, 26(4): 356-366, 2015.
- Cai, Q.G., Lu, Z.X., and Wang, G.P.: Process model of erosion and sediment yield in a typical small watershed of Loess Hilly and Gully Region. *Acta Geographica Sinica*, 51(2):108-117, 1996. [In Chinese](#).
- Cao, L., Zhang, K., Dai, H., and Liang, Y.: Modeling interrill erosion on unpaved roads in the Loess Plateau of China. [Land Degradation and Development](#) *Land Degradation & Development*, 26(8): 825-832, 2015.
- Caro, A., Legarda, F., Romero, L., and Olondo, C.: Map on predicted deposition of Cs-137 in Spanish soils from geostatistical analyses. *Journal of Environmental Radioactivity*, 115c(1): 53-59, 2012.
- Cheng, L., Yang, Q.K., Xie, H.X., Wang, C.M., and Guo, W.L.: GIS and CSLE based quantitative assessment of soil erosion in Shaanxi, China. *Journal of Soil and Water Conservation*, 23(5):61-66, 2009.
- Chen, T.F., and Cui, P.: Prediction of soil erosion on the embankment slope of Xichang to Panzihua highway, Sichuan, China. *Journal of Chengdu University of Technology (Science & Technology Edition)*, 33(4):371-375, 2006.
- Chen, Z.F., Guo, H.Z., Shi, D.M., and Tang, X.W.: Experimental study on effect of topographical factors on purple cultivated slopes land soil erosion. *Journal of Soil and Water Conservation*, 24(5): 83-87, 2010.
- Cui, S.F., Pan, Y.H., Wu, Q.Y., Zhang, Z.H., Zhang, B.X., Hao, C.H., and Ren, S.G.: Simulation and prediction of sediment under interval coverage on Lou soil slope. *Journal of Soil and Water Conservation*, 27(5): 7-11, 2013.

- Dai, H.L., Cao, S.L., Geng, X.Y.: CFNN modification and its application in predicting soil erosion on slope land. *Journal of Sichuan University (Engineering Science Edition)*, 40(5):45-50, 2008.
- Dang, X.H., Liu, G.B., Meng, W.W., and Jia, R.Y.: A virtual water-based analysis on the response of water resources to small watershed integrated management. *Yellow River*, 35(3): 55-57, 2013.
- 5 Fan, R.Y.: Calculation equation of soil loss in a small watershed in the middle reaches of the Yellow River. *Soil and Water Conservation in China*, (2):12-18, 1995.
- Foster, G.R., Overcash, M.R., and Davidson, J.M.: Soil erosion modeling: special considerations for nutrient pollution evaluation of field sized area. *Environmental impact of nonpoint source pollution*, pp. 213-240, 1980.
- 10 Fu, S.H., Zhang, W.G., Liu, B.Y., Zhu, Q.J., Wu, J.D., Duan, S.H., and Li, Y.G.: Soil erosion model of small watershed in mountain area of Beijing. *Research of Soil and Water Conservation*, 8(4): 114-120, 2001.
- Fu, Y.L., Zhang, X.P., Chen, F.J., Wan, L., Wu, Y., and Liu, G.B.: Land Use/Cover Pattern Survey under the Background of Grain for Green Policy Implementation in the Loess Hilly-Gully Region-A Case Study of Majiagou Catchment, Ansai County. *Research of Soil and Water Conservation*, 17 (6):81-85, 2010.
- 15 Gao, G, Ma, Y., and Fu, B.: Temporal variations of flow-sediment relationships in a highly erodible catchment of the Loess Plateau, China. ~~Land Degradation and Development~~[Land Degradation & Development](#), 27 (3): 758-772, 2016-  
[doi:10.1002/ldr.2455](#).
- Gao, P., Zhang, X.C., Mu, X.M., Wang, F., Li, R., and Zhang, X.P.: Trend and change-point analyses of streamflow and sediment discharge in the Yellow River during 1950-2005. *Hydrological Sciences Journal*, 55(2): 275-285, 2010.
- 20 ~~Gao, P.L., and Lei, T.W.: Dynamic process simulation model for soil erosion of small-scale watershed system. Transactions of the Chinese Society of Agricultural Engineering, 26(10): 45-50, 2010.~~
- Gessesse, B., Bewket, W., and Bräuning, A.: Model-Based Characterization and Monitoring of Runoff and Soil Erosion in Response to Land Use/land Cover Changes in the Modjo Watershed, Ethiopia. ~~Land Degradation and Development~~[Land Degradation & Development](#), 26(7): 711-724, 2015.
- 25 Guo, Q.K., Liu, B.Y., Zhu, S.B., Wang, G.Y., Liu, Y.N., and Wang, A.J.: Soil and water conservation measures in China. *Soil and Water Conservation in China*, (10): 22-26, 2013. [In Chinese](#).
- ~~Hessel, R., and Jetten, V.: Suitability of transport equations in modeling soil erosion for a small Loess Plateau catchment. Engineering Geology, 91(1): 56-71, 2007.~~
- Jia, L.Z., Gao, J.E., Zhang, Y.X., Zhang, M.J., Wang, X.W., and Li, X.H.: Analysis of Rainstorm Erosion Disaster in Terrace Field in Loess Hilly and Gully Region. *Research of Soil and Water Conservation*, 21(4):7-11, 2014.
- 30 Jing, K., Wang, W.Z., [and](#) Zheng, F.L.: Soil erosion and environment in China. ~~Science Press, Beijing-~~[Science Press](#), 1-359, 2005.

**Comment [AJL31]:** I have not found this source. Can you check it?

**Comment [AJL32]:** I have not found this source. If a book, add editors, publishing company and place of edition.

**Comment [AJL33]:** I have not found this source. In Chinese? Please, check.

**Comment [AJL34]:** I have not found this source. In Chinese? Please, check.

**Comment [AJL35]:** I have corrected author names (Peiling and Tingwu) and moved it to its place in the list. I have corrected the citation in the main text.

**Comment [AJL36]:** Author names were wrong (Rudi & Victor). I have corrected them and moved here for alphabetical order. Check at: <http://dx.doi.org/10.1016/j.enggeo.2006.12.013>

- Li, B.B., Zheng, F.L., Long, D.C., and Jiang, Z.S.: Spatial distribution of soil erosion intensity in Zhifanggou small watershed based on GIS. *Scientia Geographica Sinica*, 29(1): 105-110, 2009.
- Li, C.Z., Wang, H., Yu, F.L., Yang, A.M., and Yan, D.H.: Impacts of soil and water conservation on runoff and sediment in Yanhe River basin. *Science of Soil and Water Conservation*, 9(1):1-8, 2011.
- 5 Li, D.K.: Vegetation change and its response to climate in the hill and ravine region of the Loess Plateau in Northern Shaanxi. *Acta Botanica Boreali-Occidentalia Sinica*, 29(5):867-873, 2009.
- Li, H.C., Gao, X.D., Zhao, X.N., Wu, P.T., Li, L.S., Ling, Q., and Sun, W.H.: Integrating a mini catchment with mulching for soil water management in a sloping jujube orchard on the semiarid Loess Plateau of China. *Solid Earth*, 7(1), 167-175, 2016b. DOI: <http://dx.doi.org/10.5194/se-7-167-2016>
- 10 Li, L., Gao, X., Wu, P., Zhao, X., Li, H., Ling, Q., and Sun, W.: Soil water content and root patterns in a rain-fed jujube plantation across stand ages on the Loess Plateau of China. *Land Degradation and Development* [Land Degradation & Development](#), 2016a. doi:DOI:10.1002/ldr.2540.
- Li, T.H., and Zheng, L.N.: Soil erosion changes in the Yanhe watershed from 2001 to 2010 based on RUSLE model. *Journal of Natural Resources*, 27(7): 1164-1175, 2012.
- 15 Liao, Y.S., Zhuo, M.N., Li, D.Q., and Cai, Q.G.: A GIS-based distributed soil erosion and sediment yield model for typical watersheds in hilly loess areas: a case study in Shejiagou catchment. *Journal of Sediment Research*, (1): 7-13, 2012.
- Lieskovský, J., and Kenderessy, P.: Modelling the effect of vegetation cover and different tillage practices on soil erosion in vineyards: A case study in vráble (Slovakia) using WATEM/SEDEM. *Land Degradation and Development* [Land Degradation & Development](#), 25(3): 288-296, 2014.
- 20 Ligonja, P.J., and Shrestha, R.P.: Soil erosion assessment in [kondea-Kondo](#) eroded area in Tanzania using universal soil loss equation, geographic information systems and socioeconomic approach. *Land Degradation and Development* [Land Degradation & Development](#), 26(4): 367-379, 2015.
- Liu, B.Y., Bi, X.G., and Fu, S.H.: Beijing Soil Erosion Equation. [Beijing](#): Science Press, [Beijing](#), 52-67, 2010.
- Liu, B.Y., Xie, Y., and Zhang, K.L.: Soil erosion prediction model. [Beijing](#): China Science and Technology Press, [Beijing](#), 2001.
- 25 Liu, B.Y., Zhang, K.L., and Xie, Y.: An Empirical Soil Loss Equation//Proc.Of 12th ISCO [Conference](#). Beijing: Tsinghua Press, 143-149, 2002.
- [Liu, L.M.: Simulation study of nonpoint source pollution and its environmental effects on water in Jialing River watershed. Doctoral Dissertation of Chongqing University, 71-90, 2009.](#)
- 30 Liu, X.Y., Yang, S.T., Dang, S.Z., Luo, Y., Li, X.Y., and Zhou, X.: Response of sediment yield to vegetation restoration at a large spatial scale in the Loess Plateau. [SCIENCE CHINA: Technological Sciences](#) [Science China Technological](#)

**Comment [AJL37]:** I have not found this source. In Chinese? Please, check.

**Comment [AJL38]:** Not a peer reviewed source.



[Sciences](#), 57(8): 1482-1489, 2014.

Long, T.Y., Li, J.C., and Liu, L.M.: Adsorbed nonpoint source pollution load of Jialing River basin. *Environmental Science*, 29(7):1811-1817, 2008.

Lu, J.Z., Chen, X.L., Li, H., Liu, H., Xiao, J.J., and Yin, J.M.: Soil erosion changes based on GIS/RS and USLE in Poyang lake basin. *Transactions of the CSAE*, 27(2): 337-344, 2011.

McCool, D., Brown, L.C., Foster, G.R., Mutchler, C.K., and Meyer, L.D.: Revised slope steepness factor for the Universal Soil Loss Equation. *Transaction of the ASAE*, 30(5):1387-1396, 1987.

Meyer, L.D.: Evolution of the universal soil loss equation. *Journal of Soil and Water Conservation*, 39:99-104, 1984.

Miao, C.Y., Yang, L., Chen, X.H., and Gao, Y.: The vegetation cover dynamics (1982–2006) in different erosion regions of the Yellow River basin, China. *Land Degradation & Development*, 23(1): 62–71, 2012.

Miao, C.Y., Ni, J.R., and Borthwick, A.G.L.: Recent changes of water discharge and sediment load in the Yellow River basin, China. *Progress in Physical Geography*, 34(4): 541-561, 2010.

Mou, J.Z., and Meng, Q.M. Calculation of sediment transport capacity in small and medium river basins in northern part of Shaanxi Province. *Yellow River*, (4): 35-37, 1983.

Mu, X.M., Zhang, X.Q., Shao, H.B., Gao, P., Wang, F., Jiao, J.Y., and Zhu, J.L.: Dynamic changes of sediment discharge and the influencing factors in the Yellow River, China, for the recent 90 years. *Clean – Soil, Air, Water*, 40(3), 303–309, 2012.

Ochoa-Cueva, P., Fries, A., Montesinos, P., Rodríguez-Díaz, J.A., and Boll, J.: Spatial Estimation of soil erosion risk by land-cover change in the Andes of Southern Ecuador. [Land Degradation and Development](#)[Land Degradation & Development](#), 26(6): 565-573, 2015.

Ongley, E.D., Zhang, X., and Yu, T.: Current status of agricultural and rural nonpoint source pollution assessment in China. *Environmental Pollution*, 158(5):1159-1168, 2010.

[Peiling, G., and Tingwu, L.: Dynamic process simulation model for soil erosion of small-scale watershed system. Transactions of the Chinese Society of Agricultural Engineering, 26\(10\): 45-50, 2010.](#)

Prosser, I.P., and Rustomji, P.: Sediment transport capacity relations for overland flow. *Progress in Physical Geography*, 24:179-193, 2000.

[Qin, J.J.: Study on the soil erosion prediction in the watershed of Three Gorge Region by CSLE: a case study in Kai County. Chongqing: Master dissertation of Southwest University, 1-96, 2013.](#)

Ran, D.C., Liu, B., Wang, H., Luo, Q.H., and Ma, Y.: Effect of soil and water conservation measures on flood and sediment reduction in typical tributaries of the middle reaches of the Yellow River. Zhengzhou: The Yellow River Water Conservancy Press, 2006.

**Comment [AJL39]:** Not a peer-reviewed source.

**Comment [AJL40]:** Add city of publication. I think it is Hong Kong, but check.

- Ren, Z.P., Zhang, G.H., and Yang, Q.K.: Characteristics of runoff and sediment variation in Yanhe River basin in last 50 years. *Journal of China Hydrology*, 32(5): 81-86, 2012.
- Renard, K.G., Foster, G.R., Weesies, G.A., McCool, D.K., and Yoder, D.C.: Predicting soil erosion by water: a guide to conservation planning with the Revised Universal Soil Loss Equation (RUSLE). USDA, Agriculture Handbook, (703): No. 703. US Department of Agriculture, Washington, DC, 367-384, 1997.
- ~~Rudi, H., and Victor, J.: Suitability of transport equations in modeling soil erosion for a small Loess Plateau catchment. *Engineering Geology*, 91(1): 56-71, 2007.~~
- Sadeghi, S.H.R., and Mizuyama, T.: Applicability of the Modified Universal Soil Loss Equation for prediction of sediment yield in Khanmirza watershed, Iran. *Hydrological Sciences Journal*, 52(5):1068-1075, 2007.
- Sarma, B., Sarma, A.K., Mahanta, C., and Singh, V.P.: Optimal ecological management practices for controlling sediment yield and peak discharge from hilly urban areas. *Journal of Hydrologic Engineering*, 20(10): 04015005, 2015.
- Schilling, K.E., Isenhardt, T.M., Palmer, J.A., Wolter, C.F., and Spooner, J.: Impacts of Land-Cover Change on Suspended Sediment Transport in Two Agricultural Watersheds. *Journal of the American Water Resources Association (JAWRA)*, 47(4):672-686, 2011.
- Shi, Y., Zhao, X., Gao, X., Zhang, S., and Wu, P.: The effects of long-term fertiliser applications on soil organic carbon and hydraulic properties of a loess soil in China. ~~Land Degradation and Development~~*Land Degradation & Development*, 27 (1): 60-67, 2016. doi:10.1002/ldr.2391.
- Singh, R., Panigrahy, N., and Philip, G.: Modified rainfall simulator infiltrometer for infiltration, runoff and erosion studies. *Agricultural Water Management*, 41(3):167-175, 1999.
- Sun, B., Zhang, L.X., Yang, L.Z., Zhang, F.S., Norse, D., and Zhu, Z.L.: Agricultural Non-Point Source Pollution in China: Causes and Mitigation Measures. *AMBIO*, 41:370-379, 2012.
- Tang, L.Q., and Chen, G.X.: A dynamic model of runoff and sediment yield from small watershed. *Journal of Hydrodynamics*, 12(2): 164-174, 1997.
- Tang, L.Q.: Sediment yield model of River Basin. *Advances in Water Science*, 7(1):43-51, 1996.
- Tian, P., J. Zhai, G. Zhao, and X. Mu.: Dynamics of Runoff and Suspended Sediment Transport in a Highly Erodible Catchment on the Chinese Loess Plateau. ~~Land Degradation and Development~~*Land Degradation & Development*, 2016, 27 (3): 839-850.-doi:10.1002/ldr.2373.
- ~~Wang, B.W.: Spatio-temporally Assessment of Soil Loess in YanHe River Basin on Loess Plateau Based on GIS and RUSLE. Research Center of soil and water conservation and ecological environment of the Ministry of education, the Chinese Academy of Sciences: Master degree thesis, 2007.~~
- Wang, D.C., and Lu, Y.D.: Development of soil erosion models abroad. *Science of Soil and Water Conservation*, 2(2):35-40,

**Comment [AJL41]:** Deleted. This is not a peer-reviewed source.

2004.

Wang, G., and Fan, Z.: Study on the changes of water and sediment in the Yellow River (Volume 1)—Analysis on the variation of water and sediment of the Yanhe River. Zhengzhou: The Yellow River Water Conservancy Press, 623-643, 2002.

5 Wang, H., Cai, Q.G., and Zhu, Y.D.: Evaluation of the EUROSEM model for predicting water erosion on steep slopeland in the Three Gorges Reservoir Area, China. *Geographical Research*, 22(5): 579-589, 2003.

Wang, S., Fu, B.J., Piao, S.L., Lü, Y.H., Ciais, P., Feng, X.M., and Wang, Y.F.: Reduced sediment transport in the Yellow River due to anthropogenic changes. *Nature Geoscience*, doi: 10.1038/NGEO26029: 38-41, 20152016.

10 Wang, S.W., Li, J.Y., Xu, Z.X., and Zhang, N.: Soil erosion model studies: A state-of-the art review. Beijing: Sciencepaper Online. <http://www.paper.edu.cn/releasepaper/content/200803-986>, 2008. [In Chinese](#).

Wang, Z.S., Wang, Z.Q., and Liu, Z.: Quantitative study on spatial variation of soil erosion in a small watershed in the Loess hilly region. *Journal of Soil Erosion and Soil Conservation*, 2(1):1-10, 1996.

Wischmeier, W.H., and Smith, D.D.: Predicting rainfall-erosion losses from cropland east of the Rocky Mountains: Guide for selection of practices for soil and water conservation. USDA Agricultural Handbook, [Washington DC](#), 1965.

15 Wischmeier, W.H., and Smith, D.D.: Predicting Rainfall Erosion losses. A Guide to Conservation Planning with the Universal Soil loss Equation. Agriculture Handbook No. 537, United States Department of Agriculture, [Springfield Washington DC, USA](#), 1978.

20 Wu, Y., Zhang, X.P., Chen, F.J., Wan, L., Fu, Y.L., and Liu, G.B.: Preliminary investigation on soil erosion and spatial distribution after returning farmland in typical watershed of Northern Shaanxi Province. *Research of Soil and Water Conservation*, 17(4): 29-33, 2010.

Xia, C.L., Shi, Z.G., Yang, Y.S., and Ou, Y.F.: Experimental study of hillside topographic factor of soil erosion in Anhui province. *Journal of Hefei University of Technology*, 21(s): 7-11, 1998.

25 Xie, H.X.: Study on the spatio-temporal change of soil loss and on the assessment of impacts on Environment of soil and water conservation in Yanhe basin. Xi'an: Doctoral Dissertation of Shaanxi Normal University, 47-59, 2008.

Xie, W.C.: Research on watershed sediment delivery ratio in the hilly region of Loess Plateau: A case study in the Yanhe basin. Beijing: Master Dissertation of Peking University, 33-50, 2012.

Xie, W.C., Li, T.H.: 2012. Research Comment on Watershed Sediment Delivery Ratio. *Acta Scientiarum Naturalium Universitatis Pekinensis*, 48(4): 685-694.

30 Xie, Y., Lin, Y., and Zhang, Y.: The development and application of the Universal Soil Loess Equation. *Progress in Geography*, 22(3): 279-287, 2003.

Xu, X.X., Gao, Z.X., and Zhao, J.N.: Trends of runoff and sediment load of Yanhe River basin and their related driving

**Comment [AJL42]:** I have not found this source. In Chinese?

**Comment [AJL43]:** I have not found this source. In Chinese?

**Comment [AJL44]:** Deleted. This is not a peer-reviewed source.

**Comment [AJL45]:** Deleted. This is not a peer-reviewed source.

forces during 1956-2009. *Journal of Sediment Research*, (2):12-18, 2012.

Yang, T., Chen, J.R., Yao, W.Y., Shi, X.J., Huang, G.R., and Xie, H.H.: Application of DEM-based runoff and sediment yield modeling in the hilly loess region\_case study on two typical small catchments in the middle stream of Yellow River. *Journal of Hydrodynamics (Ser. A)*, 22(5): 583-591, 2007.

5 Yang, T., Chen, J.R., Zhou, Y., Yao, W.Y., Chen, X., Shi, X.J., Xu, Y., and Huang, G.R.: Scenario simulation of runoff and sediment processes in the small catchment in the hilly-gully region of Loess Plateau. *Science of Soil and Erosion Conservation*, 6(2): 8-14, 2008.

Yao, W.Y., and Xiao, P.Q.: Research direction of the study of soil erosion in the Loess Plateau. *Advances in Science and Technology of Water Resources*, 32(2): 73-78, 2012.

10 Yao, W.Y., Xu J.H., and Ran D.C.: Analysis and evaluation of water and sediment variation in the Yellow River basin. Zhengzhou: The Yellow River Water Conservancy Press, 2011.

Yin, G.K., and Chen, Q.L.: Characteristic index and statistical model of sediment yield in small drainage basins of Loess Plateau in China. *Acta Geographica Sinica*, 44(1):32-44, 1989.

15 Yu, G.Q., Li, Z.B., Zhang, X., Li, P., Chen, L., and Jia, L.L.: Experimental study on runoff erosion and sediment yield under field simulated rainfall conditions. *Journal of Soil and Water Conservation*, 23 (4):10-14, 2009.

Yu, W.J., Jiao J.Y., Chen, Y., Wang D.L., Wang, N., and Zhao, H.K.: Seed removal due to overland flow on abandoned slopes in the Chinese Hilly Gullied Loess Plateau Region. [Land Degradation and Development](#)~~Land Degradation & Development~~, 2016. doi:10.1002/ldr.2519.

20 Yu, Y., Wei, W., Chen, L.D., Jia, F.Y., Yang, L., Zhang, H.D., Feng, T.J.: Responses of vertical soil moisture to rainfall pulses and land uses in a typical loess hilly area, China. *Solid Earth*, 6 (2), 595-608, 2015. DOI-  
<http://dx.doi.org/10.5194/se-6-595-2015>

Zhang, K.L., Peng, W.Y., and Yang, H.L.: Soil erodibility and its estimation for agricultural soil in China. *Acta Pedologica Sinica*, 44(1):7-13, 2007.

25 Zhou, P.H., Zhang, X.D., and Tang, K.L.: Rainfall installation of simulated soil erosion experiment hall of the State Key Laboratory of Soil Erosion and Dryland Farming on Loess Plateau. *Bulletin of Soil and Water Conservation*, 20(4): 27-30, 45, 2000.

Zhang, Q.L., Chen, Y.X., Yu, Q.G., Deng, H., and Tian, P.: A review on nonpoint source pollution models. *Chinese Journal of Applied Ecology*, 18(8): 1886-1890, 2007.

30 Zhang, S.G., Zhang, X.H., and Wang, Y.L.: Reflections on non point source pollution control problem in the Yellow River. *Soil and Water Conservation in China*, (8):11-12, 2004.

Zhang, W.B., Xie, Y., and Liu, B.Y.: Spatial variation of rainfall erosion in China. *Journal of Mountain Science*, 21(1):33-40,

**Comment [AJL46]:** I have not found this. Check. In Chinese?

2003.

Zhang, Y., Liu, X.C., Li, Z.G., and Zhu, Q.K.: Surveying soil erosion condition in Loess Plateau using soil erosion model. Transactions of the Chinese Society of Agricultural Engineering, 28(10): 165-171, 2012.

Zhao, C., Gao, J., Huang, Y., Wang, G., and Xu, Z.: The contribution of *Astragalus Adsurgens adsurgens* roots and canopy to water erosion control in the water-wind crisscrossed erosion region of the Loess Plateau, China. *Land Degradation and Development*, 2016a. doi:10.1002/ldr.2508.

Zhao, G., Mu, X., Wen, Z., Wang, F., and Gao, P.: Soil erosion, conservation, and eco-environment changes in the Loess Plateau of China. *Land Degradation & Development*, 24: 499-510, 2013.

Zhao, G., Mu, X., Jiao, J., An, Z., Klik, A., Wang, F., Jiao, F., Yue, X., Gao, P., and Sun, W.: Evidence and causes of spatiotemporal changes in runoff and sediment yield on the Chinese Loess Plateau. *Land Degradation and Development*, 2016b. doi:10.1002/ldr.2534.

Zhao, X., Wu, P., Gao, X., and Persaud, N.: Soil quality indicators in relation to land use and topography in a small catchment on the Loess Plateau of China. *Land Degradation and Development* 26 (1): 54-61, 2015. doi:10.1002/ldr.2199.

Zhao, X.N., Wu, P.T., Feng, H., Wang, W.Z., and Wu, F.Q.: Research on slope soil erosion based on manpower neural network. *Science of Soil and Water Conservation*, 2(3):32-35, 2004.

Zhou, Z.C., and Shangguan, Z.P.: Overview on soil erosion model research. *Science of Soil and Water Conservation*, 2(1): 52-55, 2004.

Zhu, H.F., Kang, M.Y., Zhao, W.W., and Guo, W.W.: Effects of soil and water conservation measures on erosion, sediment delivery and deposition in Yanhe River basin. *Research of Soil and Water Conservation*, 14(4):1-4, 2007.

Zhu, Q.K., Qin, W., and Zhang, Y.: Soil erosion and sediment yield and its response to vegetation restoration in the watershed. *Beijing: Science Press, Beijing*, 2016.

**Comment [AJL47]:** I have re-written the species name in italics.

**Formatted:** Font: Italic

**Formatted:** Font: Italic

5

10

15

**Table 1: Descriptions and sources of the environmental database for the Majiagou River watershed.**

**Comment [AJL48]:** I have aligned all text in the table up and left.

| Data layer          | Format | Description                                                                                                                               | Source                                                                                                                                                                                                                                                                                   |
|---------------------|--------|-------------------------------------------------------------------------------------------------------------------------------------------|------------------------------------------------------------------------------------------------------------------------------------------------------------------------------------------------------------------------------------------------------------------------------------------|
| DEM                 | Raster | 30 m spatial resolution DEM data of the Majiagou watershed                                                                                | Computer Network Information Center, Chinese Academy of Sciences<br><a href="http://datamirror.csdb.cn/index.jsp">http://datamirror.csdb.cn/index.jsp</a>                                                                                                                                |
| Land use            | Raster | 30 m spatial resolution Farmland, grassland, forest land, residential area, water area, sand                                              | Data Center for Cold and Arid Region Sciences<br><a href="http://westdc.westgis.ac.cn/">http://westdc.westgis.ac.cn/</a>                                                                                                                                                                 |
| precipitation       | DBF    | Daily values in Ansai, Yanan, Yanchang, and other rain gauges (1957-2013)                                                                 | China Meteorological Data Sharing Service Network<br><a href="http://www.cdc.sciencedata.cn">http://www.cdc.sciencedata.cn</a>                                                                                                                                                           |
| Soil                | DBF    | Physical and chemical properties (organic matter, soil texture, sand fraction, clay fraction, structural coefficient, permeability level) | ①-(1) Soil Survey Office in Shaanxi Province. Dataset of the Second Soil Survey in Shaanxi Province (1979-1990).<br>②-(2) Soil quality background in Loess Hilly Region (2000-2008).<br>Data Sharing Infrastructure of Earth System Science_Data Sharing Infrastructure of Loess Plateau |
| Runoff and sediment | Excel  | Time series of annual observed values in Ganguyi hydrological station (1954-2012), Ansai and Zaoyuan hydrological stations (2006-2012)    | National Science & Technology Infrastructure of China, Data Sharing Infrastructure of Earth System Science ( <a href="http://loess.geodata.cn/">http://loess.geodata.cn/</a> )                                                                                                           |

20

**Table 2: ~~The annual~~Annual dynamic values of R factor (MJ·mm/hm<sup>2</sup>·h·a) in the Majiagou River watershed from 1995 to 2013.**

**Comment [AJL49]:** I think this table may be summarized in the main text and deleted.

| Year | R value | Year | R value | Year | R value | Year | R value |
|------|---------|------|---------|------|---------|------|---------|
|------|---------|------|---------|------|---------|------|---------|

|      |          |      |          |      |          |      |          |
|------|----------|------|----------|------|----------|------|----------|
| 1995 | 1240.416 | 2000 | 759.223  | 2005 | 1573.623 | 2010 | 1235.926 |
| 1996 | 1046.692 | 2001 | 2004.196 | 2006 | 1957.735 | 2011 | 1904.582 |
| 1997 | 1253.405 | 2002 | 1856.162 | 2007 | 1515.931 | 2012 | 1470.239 |
| 1998 | 1804.647 | 2003 | 1890.972 | 2008 | 937.696  | 2013 | 5644.205 |
| 1999 | 849.033  | 2004 | 1166.029 | 2009 | 1797.271 |      |          |

**Table 3 Classification and gradation of soil erosion, percentage in the Majiagou River watershed in 1995 and 2010.**

| Erosion gradation                      | Erosion modulus rate<br>( $t/hm^2 \cdot a$ ) ( $Mg km^{-2} year^{-1}$ ) | 1995      |                 | 2010      |                 |
|----------------------------------------|-------------------------------------------------------------------------|-----------|-----------------|-----------|-----------------|
|                                        |                                                                         | Ratio (%) | Area ( $hm^2$ ) | Ratio (%) | Area ( $hm^2$ ) |
| <del>mild</del> Very low               | <5                                                                      | 11.60     | 856.17          | 9.55      | 704.85          |
| <del>mild</del> Low                    | 5~10                                                                    | 8.85      | 653.08          | 8.01      | 591.36          |
| <del>mild</del> Moderately low         | 10~25                                                                   | 34.96     | 2581.46         | 29.37     | 2168.31         |
| <del>moderate</del> Moderate           | 25~50                                                                   | 37.35     | 2757.67         | 40.63     | 2999.59         |
| <del>intensive</del> Intense           | 50~80                                                                   | 6.12      | 451.98          | 10.34     | 763.59          |
| <del>very-intensive</del> Very intense | 80~150                                                                  | 1.12      | 82.63           | 2.06      | 152.32          |
| <del>severe</del> Extreme              | >150                                                                    | 0.04      | 2.99            | 0.04      | 2.99            |
| <del>sum</del> Total                   |                                                                         | 100       | 7383            | 100       | 7383            |

**Formatted:** Not Superscript/ Subscript

**Comment [AJL50]:** If not determined, substitute with "ND" and add "ND: not determined" to the caption.

5

10

15

20

25

5

10

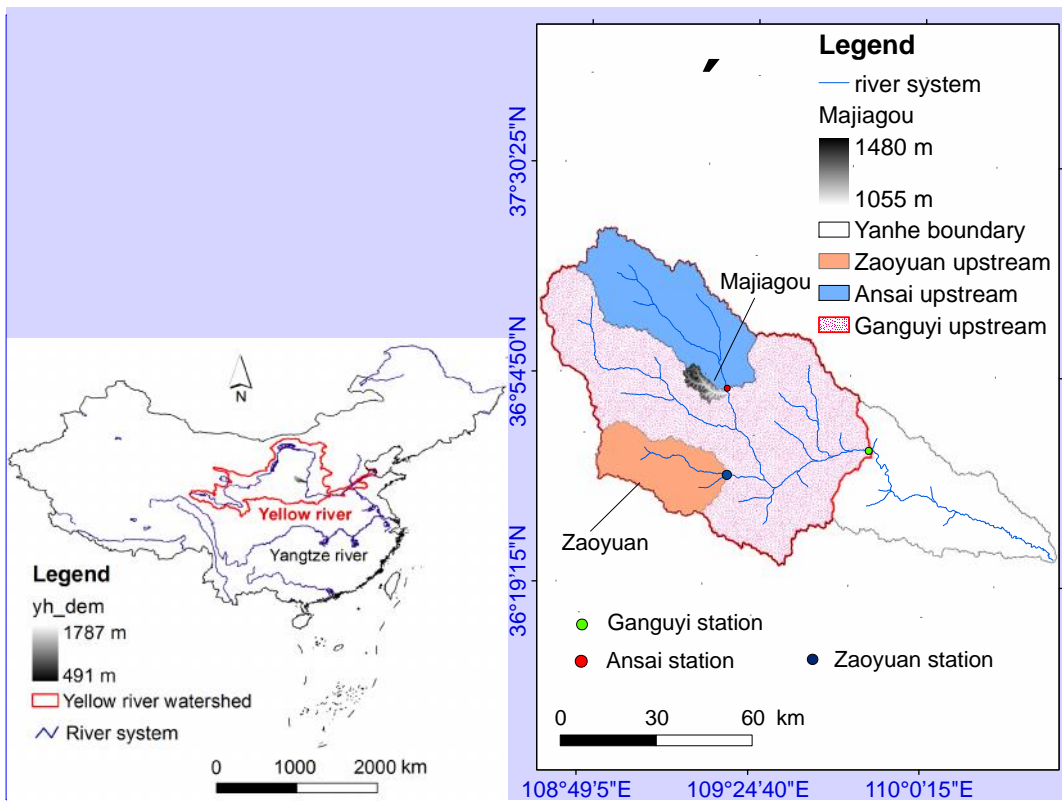

**Comment [AJL51]:** General map on the left:

- Delete everything except north arrow, scale and country borders. The objective of this map is only to provide information for the location of the study area.

- Delete the elevation scale (elevation of the very small area showed is not necessary).

- Add the study area.

Detailed map on the right:

- Delete the elevation scale and greyscale for elevation in the map. Provide information in the main text if necessary.

- Substitute “Yanhe boundary” with “Yanhe catchment”. Also for Zaoyuan, Ansai and Ganguyi.

- Change blue coordinates into black.

15 **Figure 1:** The relative location between the Yanhe River watershed and the Yellow River/Yellow River Basin, the geographical location sketch of the Majiagou River watershed, Zaoyuan upstream, Ansai upstream, Ganguyi upstream in the river system of Yanhe River watershed.



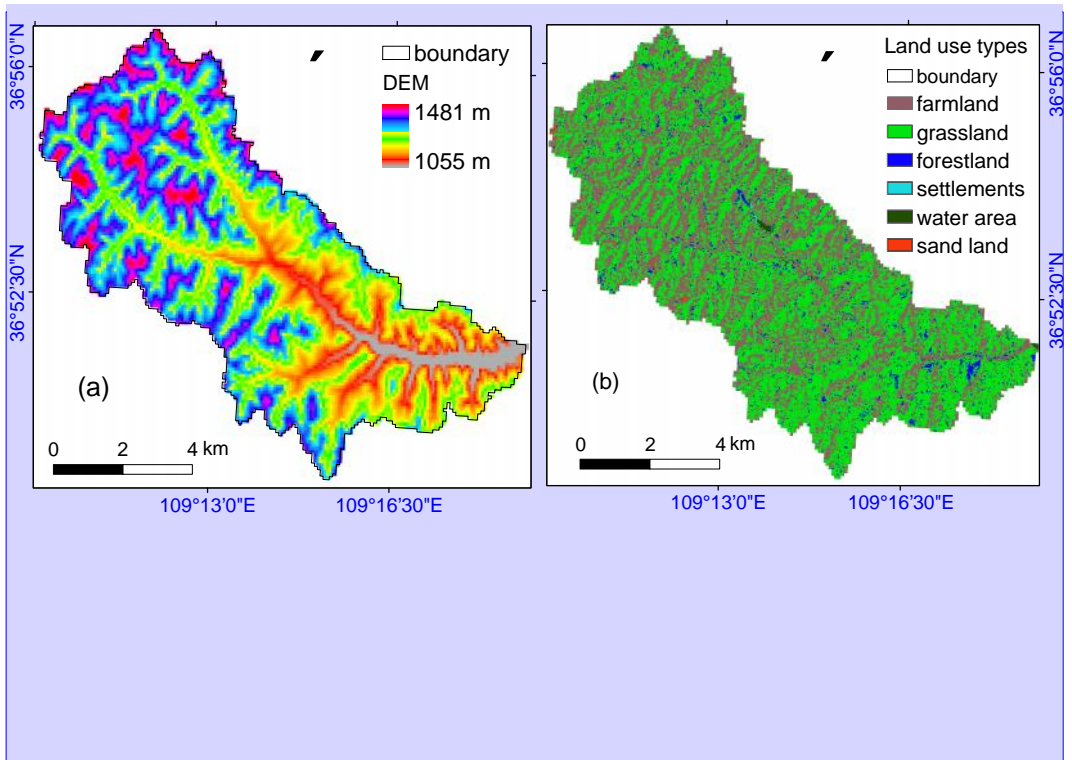

**Comment [AJL52]:** In both legends, delete "boundary".  
 Use only one north-arrow and one scale in the left. Delete those in the right.  
 Use black color for urban settlements.  
 Use cyan color for water areas.  
 Coordinates in black color.

**Figure 2:** Figure 2: (a) Elevation map of the study area; (b) landuse types of the Majiagon River catchment. Longitude and latitude coordinates of the study area, digital elevation model (DEM) data, reclassified land use types of the Majiagon River watershed

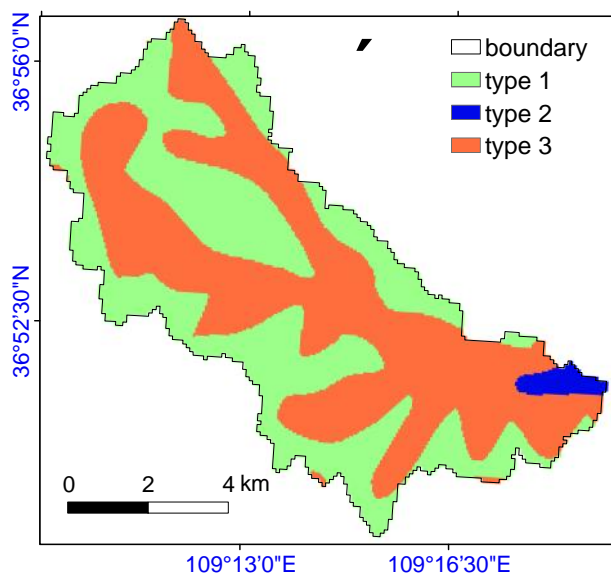

Figure 3: Soil types of the Majiagou River watershed (Legend notes: Type 1: Tillage-tillage erosive loessal soil (80%) + Erosive erosive loessal soil (20%); Type 2: Tillage-tillage erosive loessal soil (80%) + Calcareous-calcareous alluvial soil (20%); Type 3: Erosive-erosive loessal soil (80%) + Tillage-tillage erosive loessal soil (20%).

5

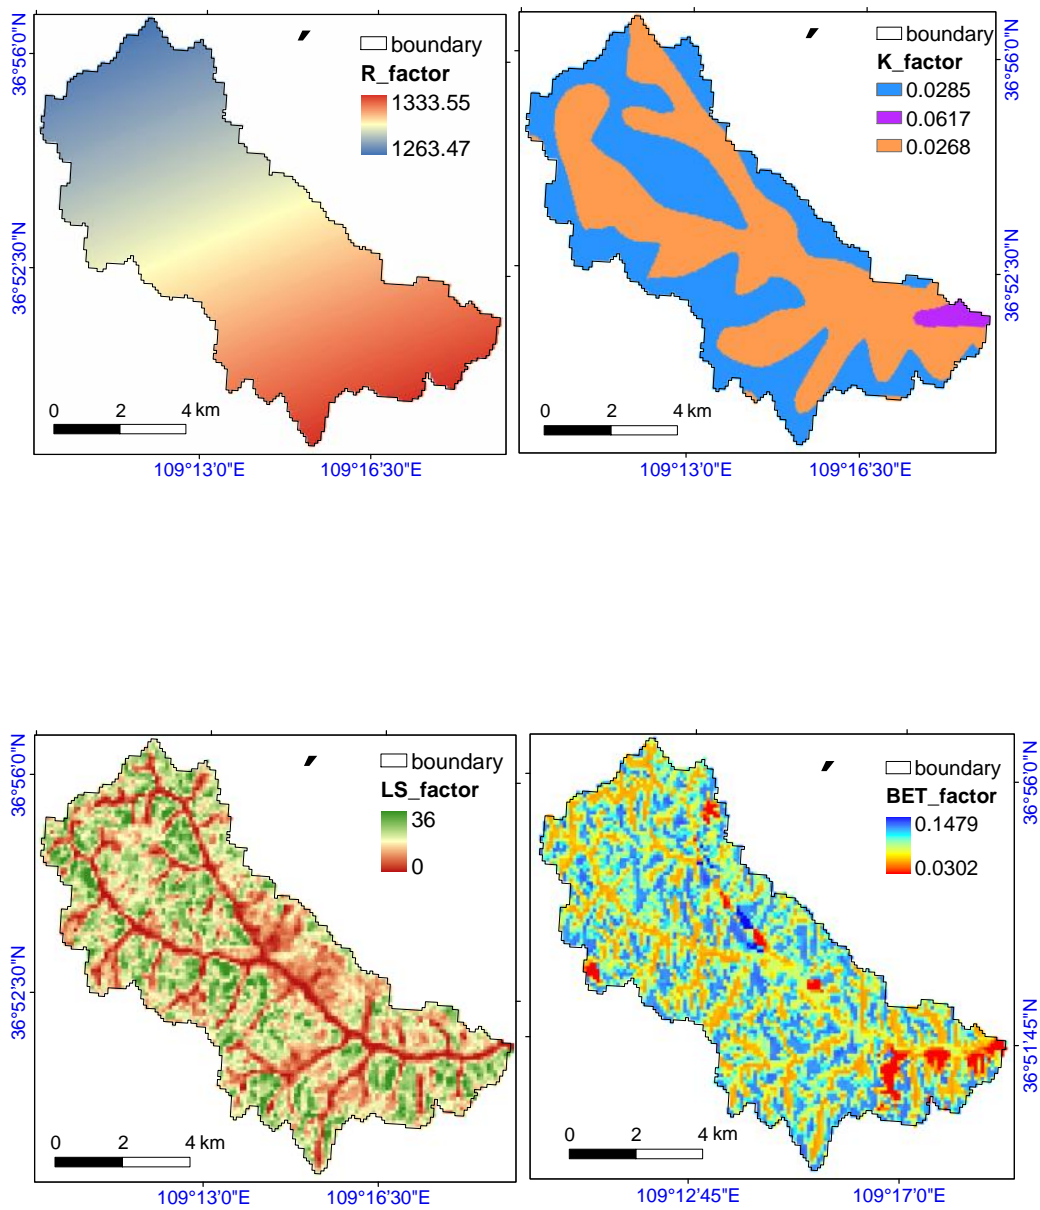

Figure 4: From left to right and up to down, Spatial-spatial distributions of annual average R factor, K factor, LS factor and BET factor in the Majiagou River watershed.

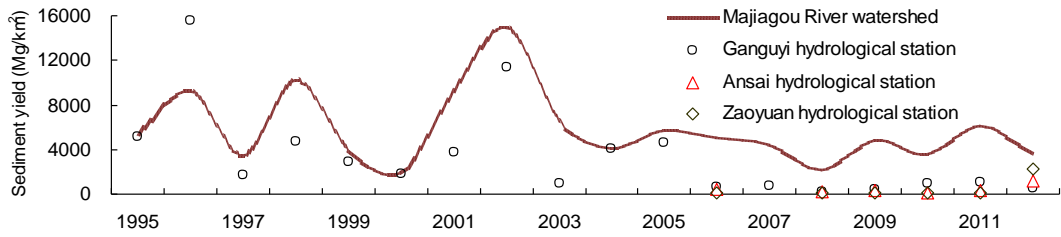

Figure 5: Validation of sediment yield modulus between Ganguyi, Ansai, Zaoyuan hydrological stations and Majiagou River watershed based on the established model

5

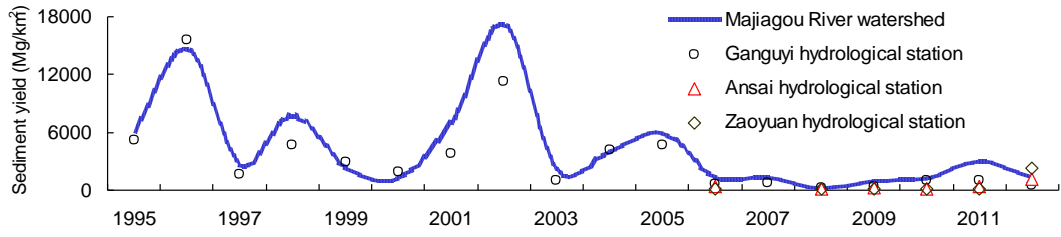

Figure 6: Validation of sediment yield modulus between Ganguyi, Ansai, Zaoyuan hydrological stations and Majiagou River watershed based on the modified model

10

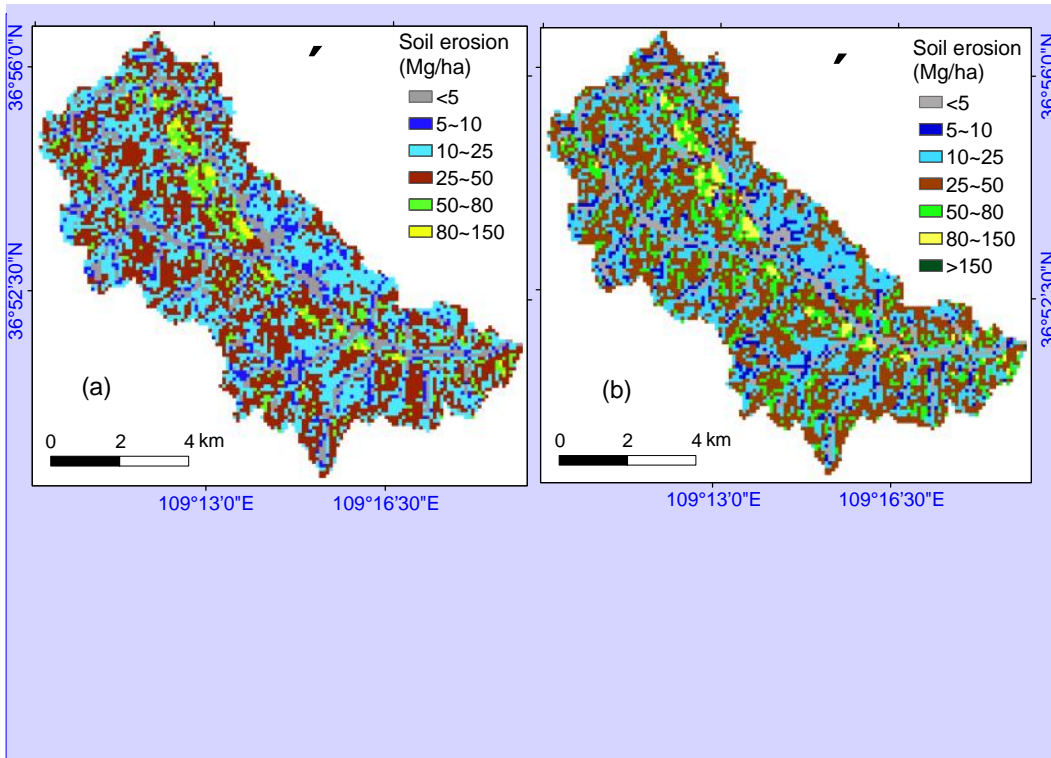

**Comment [AJL53]:** Coordinates in black.  
 Do not repeat legends. Delete the legend on the left and keep the legend on the right.  
 As previously, use only one north arrow and one scale.

Figure 7: Spatial distribution of soil erosion gradations of the Majiagou River watershed: (a) 1995; (b) 2010.

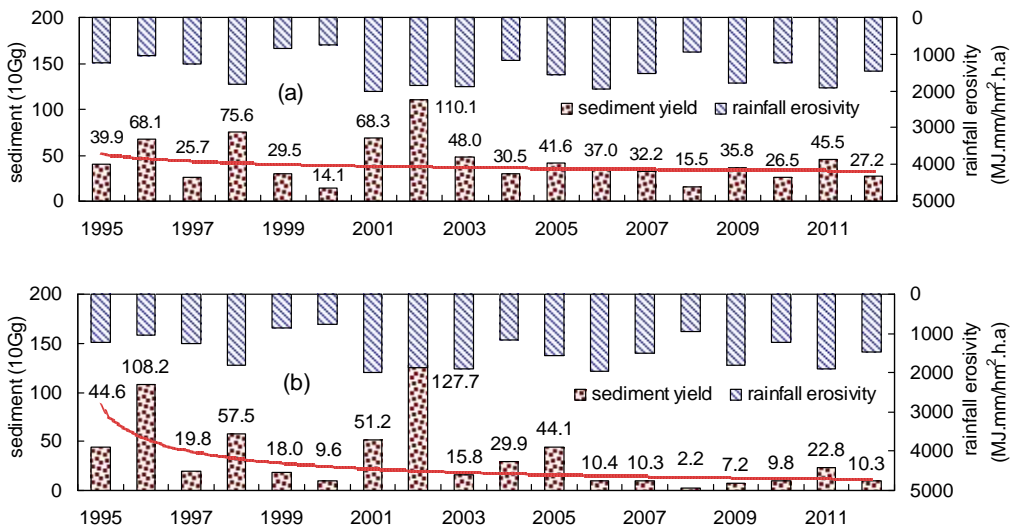

Figure 8: Comparative variations of sediment yield and rainfall erosivity in the Majiagou River watershed from 1995 to 2012: (a) the established dynamic model, (b) the modified dynamic model

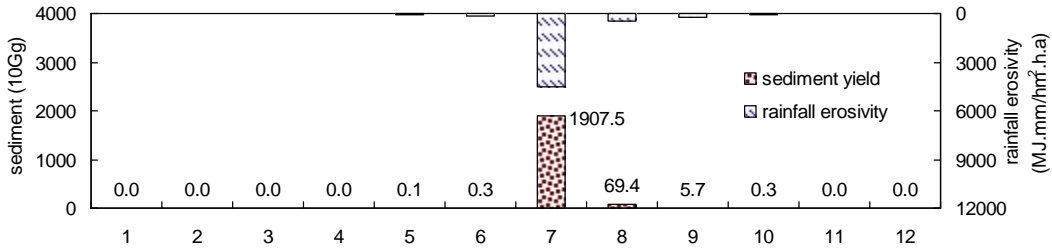

Figure 9: Comparison of monthly sediment yield and rainfall erosivity in the Majiagou River watershed in 2013

5

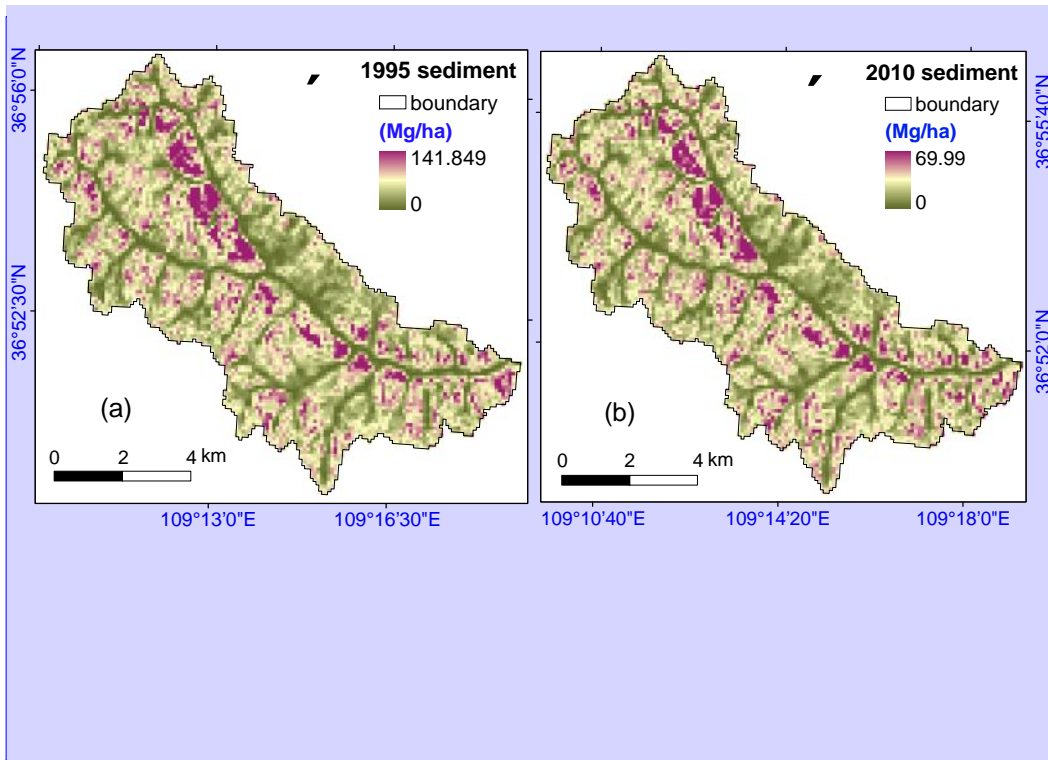

Figure 10: Spatial distribution of sediment yield modulus of the Majiagou River watershed: (a) 1995; (b) 2010

**Comment [AJL54]:** Coordinates in black.  
 Delete "1995 sediment" and "2010 sediment" (this information is in the caption).  
 Delete "boundary" in the legends.  
 Delete units (move this information to the caption).  
 As previously, use only one north arrow and one scale.
